# Supplementary material for: Significant Shortening of Leukocyte Telomere Length in Korean Patients with Bipolar Disorder 1
Source: PubMed Central journal article supplement — Clin Psychopharmacol Neurosci. 2021 Aug 31;19(3):559–63. doi: 10.9758/cpn.2021.19.3.559 (PMC8316664; doi:10.9758/cpn.2021.19.3.559), 2021-08-31
Supplement: cpn-19-3-559-supple.pdf [file cpn-19-3-559-supple.pdf]

**Supplementary Table 1.** Primer sequences (A) and PCR condition (B)

(A)

| Gene     |         | Sequence (5'→3')                        |
|----------|---------|-----------------------------------------|
| Telomere | Tel 1   | GGTTTTGAGGGTGAGGGTGAGGGTGAGGGTGAGGGT    |
|          | Tel 2   | TCCCGACTATCCCTATCCCTATCCCTATCCCTATCCCTA |
| 36B4     | u       | CAGCAAGTGGGAAGGTGTAATCC                 |
| ASPG     | d       | CCCATTCTATCATCAACGGGTACAA               |
|          | forward | GAGCTGTTGACGAAAGGAG                     |
|          | reverse | CAGAAGAGAATCCCGGCTAA                    |

(B)

| Gene     | Predenaturation | Denaturation    | Annealing and extension | Cycles    |
|----------|-----------------|-----------------|-------------------------|-----------|
| Telomere | 95°C for 10 min | 95°C for 15 sec | 58.2°C for 1 min        | 40 cycles |
| 36B4     |                 |                 | 59.7°C for 1 min        |           |
| ASPG     |                 |                 | 59.7°C for 1 min        |           |

PCR, polymerase chain reaction; ASPG, accessory subunit of polymerase gamma.
